# Supplementary material
Source: PubMed Central journal article supplement (PMC3143547)

**Table S1. Time to best clinical, biochemical, and radiographic response in individual patients with KSHV-MCD-treated with AZT/VGC**

| Pt.             | RESPONSES |       |             |       |              |       | Total<br># of<br>Cycles | Recurrent or<br>Progressive<br>KSHV-MCD |
|-----------------|-----------|-------|-------------|-------|--------------|-------|-------------------------|-----------------------------------------|
|                 | Clinical  |       | Biochemical |       | Radiographic |       |                         |                                         |
|                 | Best      | Cycle | Best        | Cycle | Best         | Cycle |                         |                                         |
| 1               | PR        | 2     | SD          | NA    | CR           | 4     | 4                       | No                                      |
| 2               | SFD       | 2     | SD          | NA    | SD           | NA    | 5                       | Yes                                     |
| 3*              | SFD       | 1     | PR          | 4     | SD           | NA    | 8                       | Yes                                     |
| 4               | CR        | 3     | SD          | NA    | SD           | NA    | 6                       | Yes                                     |
| 5               | CR        | 5     | PR          | 10    | CR           | 6     | 12                      | No                                      |
| 6 <sup>†</sup>  | CR        | 3     | CR          | 7     | CR           | 22    | 29                      | No                                      |
| 7               | CR        | 2     | PR          | 4     | SD           | NA    | 11                      | No                                      |
| 8 <sup>†</sup>  | CR        | 7     | CR          | 10    | CR           | 20    | 20                      | No                                      |
| 9               | CR        | 2     | PR          | 2     | SD           | NA    | 10                      | Yes                                     |
| 10 <sup>†</sup> | CR        | 2     | CR          | 4     | CRu          | 13    | 13                      | No                                      |
| 11              | SFD       | 1     | SD          | NA    | SD           | NA    | 8                       | Yes                                     |
| 12              | SD        | NA    | SD          | NA    | SD           | NA    | 2                       | Yes                                     |
| 13              | SD        | NA    | PD          | NA    | NA           | NA    | 1                       | Yes                                     |
| 14              | PR        | 2     | SD          | NA    | SD           | NA    | 8                       | Yes                                     |

Pt. = patient number, CR = complete response, CRu = complete response unconfirmed,

SFD = symptom free disease, PR = partial response, SD = stable disease, PD = progressive disease.

Cycle indicates the number of cycles of therapy required to first obtain the best result in each category. For patients who did not achieve at least a PR, time to best response is not applicable (NA).

\* Symptom free disease, not classified as complete clinical response due to persistent adenopathy on physical exam

† Patients who completed therapy with AZT/VGC who continue symptom free with 10, 29, and 33 months of follow up

**Figure S1. C-Reactive protein on day 1 of cycles 1-4.** Serum C-reactive protein (CRP) on patients 1-14. Sample from Day 1 of therapy for cycles 1-4. Cycle 1 value represents baseline (CRP). Patients 5, 6, 8, and 10 (solid symbols) went on to obtain an overall complete response. The lower limit of detection of CRP assay = 0.4 mg/dL.

Figure S1

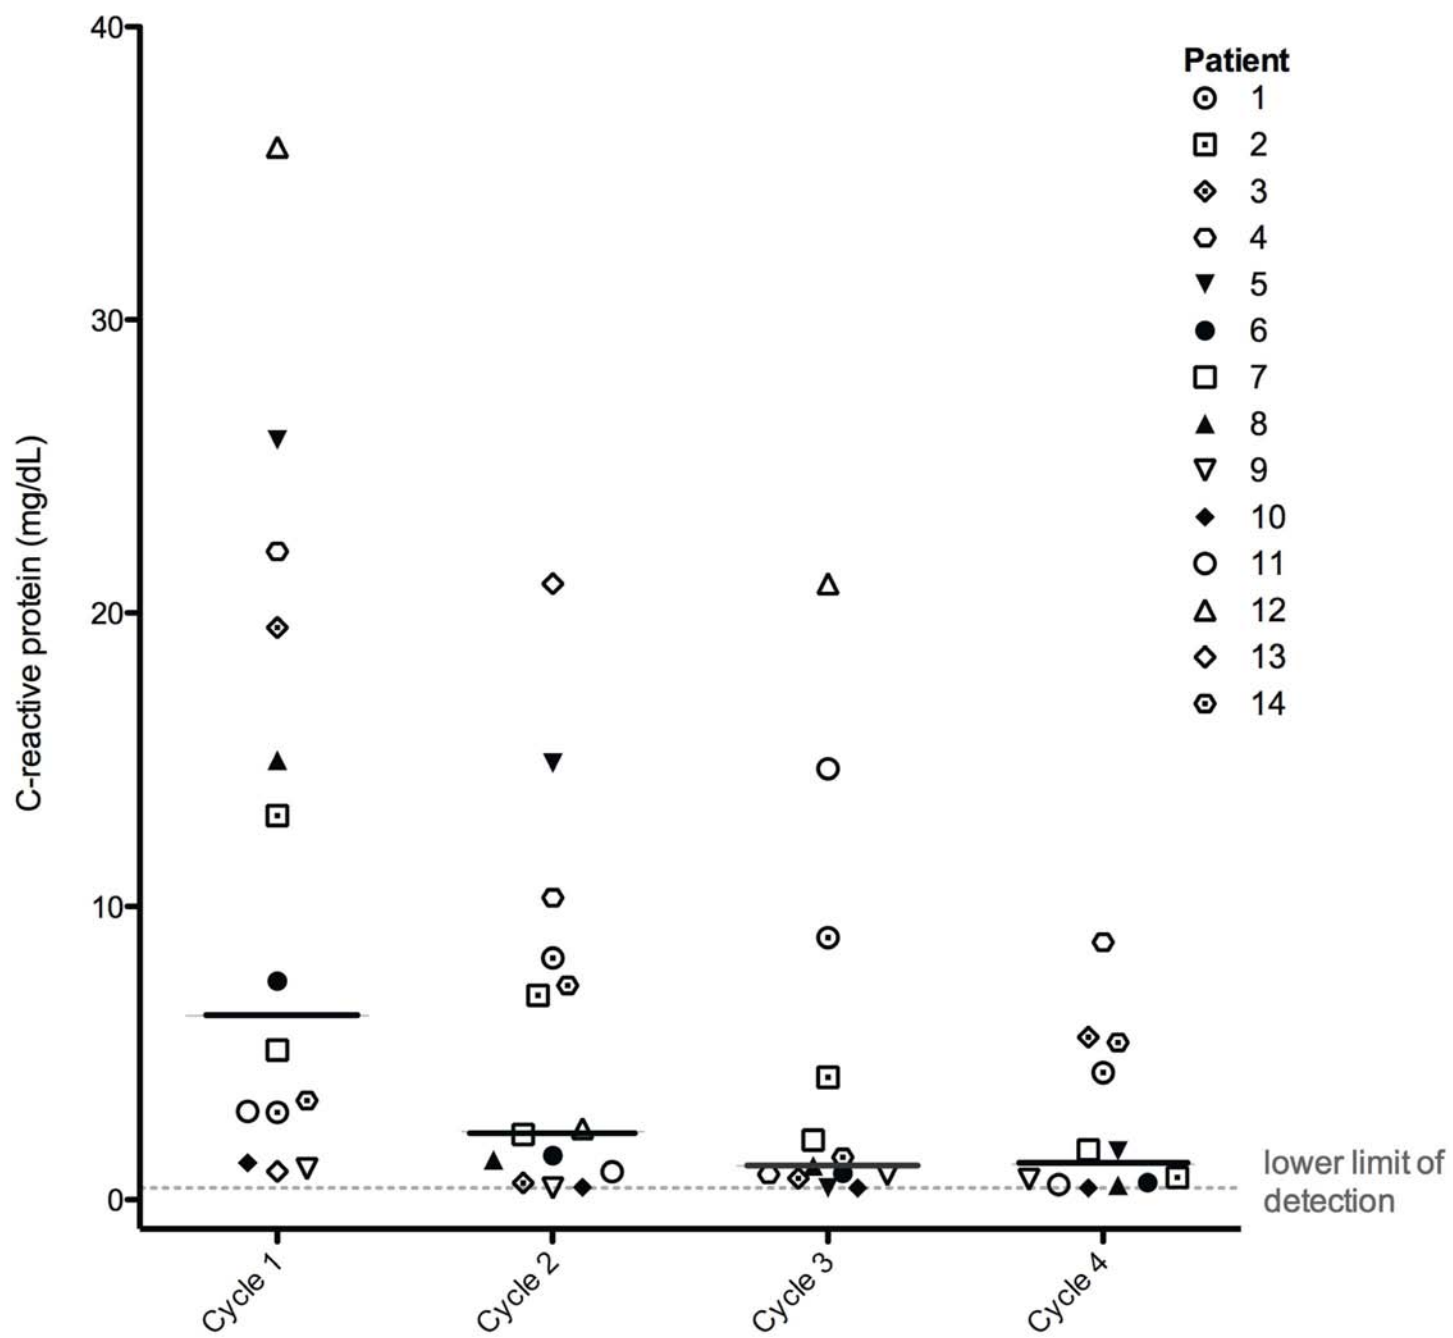

Supplement: supp_blood-2010-11-317610_Document1.pdf [file supp_blood-2010-11-317610_Document1.pdf]
